# Supplementary material for: Tough, stretchable and compressive alginate-based hydrogels achieved by non-covalent interactions
Source: Royal Society of Chemistry journal article supplement (doi:10.1039/d0ra03733h), 2020-01-01
Supplement: d0ra03733h1.pdf [file d0ra03733h1.pdf]

# **Tough, stretchable and compressive alginate hydrogels achieved by the non-covalent interactions**

*Zhanxin Jing\**, *Xiangyi Dai*, *Xueying Xian*, *Xiaomei Du*, *Mingneng Liao*, *Pengzhi Hong*, *Yong Li\**

*College of Chemistry and Environment, Guangdong Ocean University, Zhanjiang, Guangdong*

*524088, People's Republic of China*

## Supporting Information

---

\* Corresponding author.

E-mail address: [jingzhan\\_xin@126.com](mailto:jingzhan_xin@126.com) (Zhanxin Jing); [yongli6808@126.com](mailto:yongli6808@126.com) (Yong Li).

**Table S1** Water contents of NaAlg/PAM semi-IPN hydrogels and CaAlg/PAM DN hydrogels

**Table S2** Mechanical properties of NaAlg/PAM semi-IPN hydrogels

**Fig. S1** The photographs of NaAlg/PAM semi-IPN hydrogel demonstrating the excellent mechanical behaviors: under stretching (a) without and (b) with central notch, compressing (c), slicing with a knife (d) holding a weight of 100g (e)

**Fig. S2** (a) Cyclic continuous step strain measurements of NaAlg5.0%/PAM2% hydrogel in which the strain was switched from 1% strain for 100s to 100% strain for 100s; (b) Cyclic continuous step strain measurements of NaAlg5.0%/PAM2% in which the strain was switched from 1% strain for 100s to various larger strains (100%, 200%, 300% and 400%) for 100s

**Fig. S3** Equilibrium swelling ratios of NaAlg/PAM semi-IPN hydrogels with different compositions in different buffer solutions: (a) hydrogels with various SMA concentrations, (b) hydrogels with various SA concentrations

**Table S1**

Water content of NaAlg/PAM semi-IPN hydrogels and CaAlg/PAM DN hydrogels

| Samples          | Water content (%) | Samples          | Water content (%) |
|------------------|-------------------|------------------|-------------------|
| NaAlg5.0%/PAM1%  | 39.9±2.4          | CaAlg5.0%/PAM1%  | 67.0±2.1          |
| NaAlg5.0%/PAM2%  | 44.7±2.3          | CaAlg5.0%/PAM2%  | 73.4±1.4          |
| NaAlg5.0%/PAM3%  | 51.8±1.8          | CaAlg5.0%/PAM3%  | 68.1±3.6          |
| NaAlg5.0%/PAM4%  | 49.2±2.3          | CaAlg5.0%/PAM4%  | 70.7±0.6          |
| NaAlg0%/PAM2%    | 52.0±2.8          | CaAlg0%/PAM2%    | 72.3±1.6          |
| NaAlg2.5%/PAM2%  | 57.5±1.8          | CaAlg2.5%/PAM2%  | 73.2±1.6          |
| NaAlg7.5%/PAM2%  | 49.1±2.8          | CaAlg7.5%/PAM2%  | 68.8±0.2          |
| NaAlg10.0%/PAM2% | 56.6±3.4          | CaAlg10.0%/PAM2% | 72.9±2.5          |

Notes: The water contents of the samples were calculated by the following equation:

$$\text{water content (\%)} = \frac{(w_o - w_d)}{w_o} \times 100\%$$
, where  $w_o$  is the weight of the as-prepared sample and  $w_d$  is the dry weight of the sample.

**Table S2**

## Mechanical properties of NaAlg/PAM semi-IPN hydrogels

| Samples          | Tensile strength (KPa) | Elongation at break (mm/mm) | Compressive strength (MPa) <sup>a</sup> |
|------------------|------------------------|-----------------------------|-----------------------------------------|
| NaAlg5.0%/PAM1%  | 202.7±28.5             | 18.5±5.1                    | 0.528±0.056                             |
| NaAlg5.0%/PAM2%  | 291.6±79.9             | 24.3±4.6                    | 0.516±0.040                             |
| NaAlg5.0%/PAM3%  | 356.6±139.8            | 27.8±6.53                   | 0.432±0.065                             |
| NaAlg5.0%/PAM4%  | 529.7±142.1            | 33.58±3.8                   | 0.396±0.046                             |
| NaAlg0%/PAM2%    | 209.9±58.9             | 32.7±6.1                    | 0.356±0.042                             |
| NaAlg2.5%/PAM2%  | 519.3±173.5            | 38.2±7.5                    | 0.463±0.053                             |
| NaAlg7.5%/PAM2%  | 678.2±108.2            | 33.2±3.4                    | 0.3278±0.087                            |
| NaAlg10.0%/PAM2% | 397.8±111.6            | 25.3±4.2                    | 0.306±0.043                             |

<sup>a</sup>at 80% strain on the compressive stress-strain curves.

**Table S3**

## Comparison of mechanical properties of alginate-based hydrogels

| Samples                                       | Hydrogel type                              | Tensile strength <sup>a</sup><br>(KPa) | Elongation at break <sup>a</sup><br>(mm/mm) | References    |
|-----------------------------------------------|--------------------------------------------|----------------------------------------|---------------------------------------------|---------------|
| Polyacrylamide/alginate/montmorillonite       | Nanocomposite and interpenetrating network | 106.2                                  | 10.1                                        | [1]           |
| Sodium alginate/polyacrylamide                | Double network                             | 530                                    | 6.89                                        | [2]           |
| Graphene oxide/sodium alginate/polyacrylamide | Nanocomposite                              | 201.7                                  | 592                                         | [3]           |
| alginate/polyacrylamide                       | Double network                             | 50.8                                   | 5.08                                        | [4]           |
| Sodium alginate/polyacrylamide                | Semi-interpenetrating network              | 678.2                                  | 33.2                                        | In this study |
| Calcium alginate/polyacrylamide               | Double network                             | 733.6                                  | 17.1                                        | In this study |

<sup>a</sup>Mechanical properties of hydrogel samples prepared in optimal ratio.

**References:**

- [1] X. Su and B. Chen, *Carbohydr. Polym.*, 2018, **197**, 497-507.
- [2] Q. Zhou, H. Kang, M. Bielec, X. Wu, Q. Cheng, W. Wei and H. Dai, *Carbohydr. Polym.*, 2018, **197**, 292-304.
- [3] J. Fan, Z. Shi, M. Lian, H. Li and J. Yin, *J. Mater. Chem. A*, 2013, **1**, 7433-7443.
- [4] B. Huang, R. Hu, Z. Xue, J. Zhao, Q. Li, T. Xia, W. Zhang and C. Lu, *Carbohydr. Polym.*, 2020, **231**, 115736.

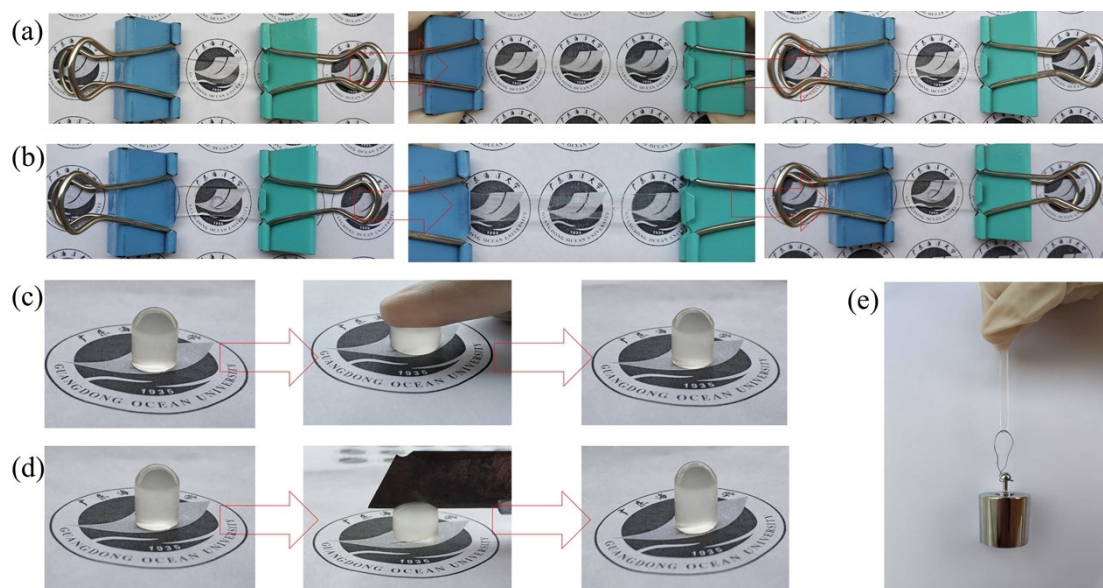

**Fig. S1** The photographs of NaAlg/PAM semi hydrogel demonstrating the excellent mechanical behaviors: under stretching (a) without and (b) with central notch, compressing (c), slicing with a knife (d) holding a weight of 100g (e)

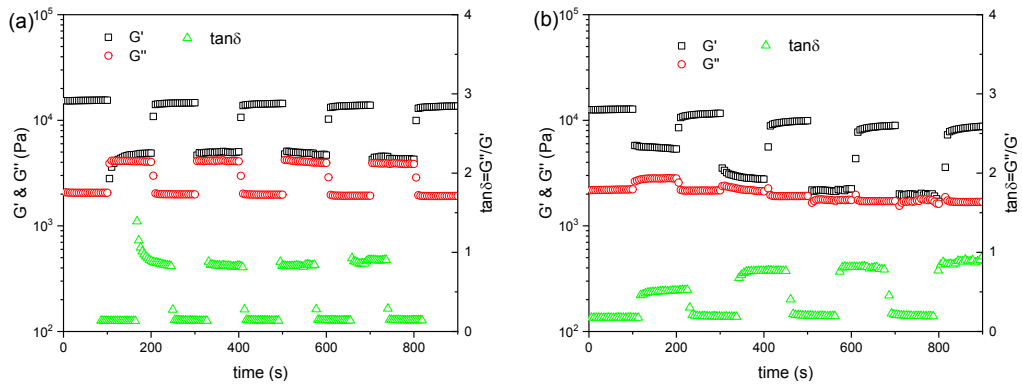

**Fig. S2** (a) Cyclic continuous step strain measurements of NaAlg5.0%/PAM2% hydrogel in which the strain was switched from 1% strain for 100s to 100% strain for 100s; (b) Cyclic continuous step strain measurements of NaAlg5.0%/PAM2% in which the strain was switched from 1% strain for 100s to various larger strains (100%, 200%, 300% and 400%) for 100s

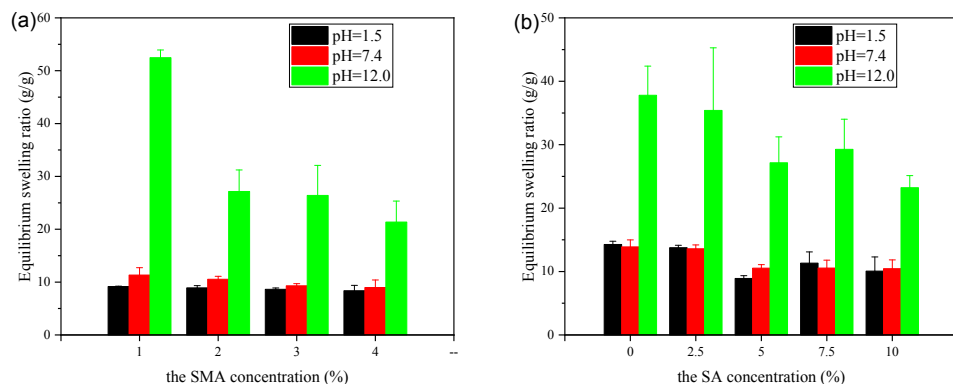

**Fig. S3** Equilibrium swelling ratios of NaAlg/PAM hydrogels with different compositions in different buffer solutions: (a) hydrogels with various SMA concentrations, (b) hydrogels with various SA concentrations
